# Supplementary material for: S = 1/2 tetracene monoradical cation/anion: ion-based one-dimensional antiferromagnetic chains
Source: Royal Society of Chemistry journal article supplement (doi:10.1039/d2cc02084j), 2022-01-01
Supplement: d2cc02084j1.pdf [file d2cc02084j1.pdf]

Electronic Supplementary Material (ESI) for ChemComm.  
This Journal is © The Royal Society of Chemistry 2022

## $S = 1/2$ Tetracene Monoradical Cation/Anion Ion-Based One-Dimensional Antiferromagnetic Chains

Wenqing Wang,<sup>\*a,b</sup> Shunjie Li,<sup>a</sup> Qianqian Wang,<sup>a</sup> Xuguang Ding,<sup>a</sup> Yong Fang,<sup>b</sup> Huapeng Ruan,<sup>b</sup> Yue Zhao<sup>b</sup> and Xinpeng Wang<sup>b</sup>

<sup>a</sup>Key Laboratory of Functional Molecular Solids, Ministry of Education, College of Chemistry and Materials Science, Anhui Normal University, Wuhu, 241002, China.

Email: wenqingwang1991@163.com

<sup>b</sup>State Key Laboratory of Coordination Chemistry, School of Chemistry and Chemical Engineering, Nanjing University, Nanjing 210023, China.

Email: xpwang@nju.edu.cn

### Content

|                                                                                                                                                                                                                        |     |
|------------------------------------------------------------------------------------------------------------------------------------------------------------------------------------------------------------------------|-----|
| Experimental Section.....                                                                                                                                                                                              | S2  |
| Table S1. Crystal data and structure refinement for $\mathbf{1}^+[\text{Al}(\text{OC}(\text{CF}_3)_3)_4]^- \cdot \text{CH}_2\text{Cl}_2$ and $[\text{K}(18\text{-c-}6)] \cdot \mathbf{1}^- \cdot (\text{THF})_2$ ..... | S3  |
| Fig. S1 Stick and Thermal ellipsoid (50%) drawing of $\mathbf{1}^-$ in $([\text{K}(18\text{-c-}6)] \cdot \mathbf{1}^-) \cdot (\text{THF})_2$ .....                                                                     | S4  |
| Table S2. Structure parameters of $\mathbf{1}$ , $\mathbf{1}^+$ and $\mathbf{1}^-$ .....                                                                                                                               | S5  |
| Table S3. The HOMA index in $\mathbf{1}$ , $\mathbf{1}^+$ and $\mathbf{1}^-$ .....                                                                                                                                     | S6  |
| Fig. S2 The SOMO of $\mathbf{1}^+$ and LUMO of $\mathbf{1}^+$ .....                                                                                                                                                    | S7  |
| Fig. S3 The SOMO of $\mathbf{1}^-$ (a) and LUMO of $\mathbf{1}^-$ .....                                                                                                                                                | S8  |
| Fig. S4 The HOMO and LUMO of $\mathbf{1}$ .....                                                                                                                                                                        | S9  |
| Fig. S5 Depiction of the polymer structure $(\mathbf{1}^+)_n$ .....                                                                                                                                                    | S10 |
| Fig. S6 UV-Vis absorption spectrum of $\mathbf{1}$ .....                                                                                                                                                               | S11 |
| Fig. S7 UV-Vis absorption spectrum of $\mathbf{1}^+[\text{Al}(\text{OC}(\text{CF}_3)_3)_4]^-$ .....                                                                                                                    | S12 |
| Fig. S8 UV-Vis absorption spectrum of $[\text{K}(18\text{-c-}6)] \cdot \mathbf{1}^-$ .....                                                                                                                             | S13 |
| Fig. S9 The $\chi_M-T$ plots for $\mathbf{1}^+[\text{Al}(\text{OC}(\text{CF}_3)_3)_4]^-$ and $[\text{K}(18\text{-c-}6)] \cdot \mathbf{1}^-$ .....                                                                      | S15 |
| Fig. S10 $\chi_M^{-1}-T$ plots of $[\text{K}(18\text{-c-}6)] \cdot \mathbf{1}^-$ and the fitting results (red line) using Curie-Weiss law.....                                                                         | S16 |
| Computational details.....                                                                                                                                                                                             | S17 |
| Mulliken spin densities for the optimized geometry of $\mathbf{1}^+$ .....                                                                                                                                             | S18 |

|                                                                                                                    |     |
|--------------------------------------------------------------------------------------------------------------------|-----|
| Mulliken spin densities for the optimized geometry of $\mathbf{1}^{\bullet}$ .....                                 | S19 |
| Mulliken spin densities for the optimized geometry of $[\mathbf{K}(18\text{-c-6})]\cdot\mathbf{1}^{\bullet}$ ..... | S20 |
| Coordinates for optimized geometries of $\mathbf{1}$ , $\mathbf{1}^{+\bullet}$ and $\mathbf{1}^{\bullet}$ .....    | S21 |

## Experimental Section

All experiments were carried out under inert atmosphere by using standard Schlenk techniques and a glove box. Solvents were dried prior to use. Commercially available chemicals were bought from Energy Chemical or Alfa-Assar and used immediately. *tert*-butyl-substituted hexabenzobenzene  $\mathbf{1}$  [S1] and  $\text{LiAl}(\text{OC}(\text{CF}_3)_3)_4$  [S2] was synthesized according to the reported method. Cyclic voltammetry was carried out in a glove box on a CHI660E electrochemical workstation with  $\text{Ag}/\text{AgNO}_3$  (0.1 M,  $\text{CH}_3\text{CN}$ ) as the reference and platinum as the working electrode. The EPR spectra were obtained using a Bruker EMX plus-6/1 variable-temperature X-band apparatus and simulated with the software of WINEPR SimFonia. The magnetic property was measured using a MPMS-XL7 SQUID on a sample prepared in a glove box. UV-Vis spectra were recorded on Lambda 750 spectrometer. The NMR spectra were performed using a Bruker DRX-400 (Germany) at room temperature in ppm downfield from internal  $\text{Me}_4\text{Si}$ . Element analyses were performed on Vario EL III elemental analyser at Shanghai Institute of Organic Chemistry, the Chinese Academy of Sciences. The crystallographic data collection were carried out on a Bruker D8 Venture diffractometer with graphite-monochromated  $\text{Mo K}\alpha$  radiation ( $\lambda = 0.71073 \text{ \AA}$ ) at 193(2) K using  $\omega$ -scan technique. The diffraction data was integrated by using the *SAINTE* program, which was also used for the intensity corrections for the Lorentz and polarization effects. Semi-empirical absorption correction was applied using the *SADABS* program. The structure was solved by direct methods and all the non-hydrogen atoms were refined anisotropically on  $F^2$  by the full-matrix least-squares technique using the SHELXL-2018 crystallographic software package. All the hydrogen atoms were generated geometrically and refined isotropically using the riding model.

**Synthesis of  $\mathbf{1}^{+\bullet}[\text{Al}(\text{OC}(\text{CF}_3)_3)_4]$ :**  $\mathbf{1}$  (0.18 g, 0.3 mmol) and  $\text{AgAl}(\text{OC}(\text{CF}_3)_3)_4$  (0.32 g, 0.3 mmol) were placed in a 100 ml Schlenk flask. Then  $\text{CH}_2\text{Cl}_2$  (40 ml) was added to the mixture under stirring at room temperature. The resultant green solution was kept stirring at 25 °C for 24 h and then filtered to remove the gray precipitate (Ag metal). The filtration was concentrated to afford green crystals of  $\mathbf{1}^{+\bullet}[\text{Al}(\text{OC}(\text{CF}_3)_3)_4]\cdot\text{CH}_2\text{Cl}_2$  that were suitable for X-ray crystallography. Isolated yield: 216 mg, 43.2% (crystals). The crystals were pumped off to remove solvent free  $\text{CH}_2\text{Cl}_2$  to perform element analyses. Elemental analysis calcd for  $\text{C}_{64}\text{H}_{38}\text{AlF}_{36}\text{O}_4$  (%) C 48.59; H 2.42; found: C 48.63; H 2.38.

**Synthesis of  $[\mathbf{K}(18\text{-c-6})]\cdot\mathbf{1}^{\bullet}$ :**  $\mathbf{1}$  (0.18 g, 0.3 mmol), K (12 mg, 0.3 mmol) and 18-crown-6 (0.08 g, 0.3 mmol) were placed in a 100 ml Schlenk flask. Then THF (40 ml) was added to the mixture under stirring at room temperature. The resultant blue solution was kept stirring at 25 °C for 24 h and filtered. The filtration was concentrated to afford blue crystals of  $[\mathbf{K}(18\text{-c-6})]\cdot\mathbf{1}^{\bullet}\cdot(\text{THF})_2$  that were suitable for X-ray crystallography. Isolated

yield: 102 mg, 31.9% (crystals). The crystals were pumped off to remove solvent free THF to perform element analyses. Elemental analysis calcd for C<sub>60</sub>H<sub>62</sub>KO<sub>6</sub> (%) C 78.48; H 6.81; found: C 78.39; H 6.85.

**Table S1.** Crystal Data and Structure Refinement for  $\mathbf{1}^+[\text{Al}(\text{OC}(\text{CF}_3)_3)_4]^- \cdot \text{CH}_2\text{Cl}_2$  and  $[\text{K}(\text{18-c-6})] \cdot \mathbf{1}^- \cdot (\text{THF})_2$ .

|                                         | $\mathbf{1}^+[\text{Al}(\text{OC}(\text{CF}_3)_3)_4]^- \cdot \text{CH}_2\text{Cl}_2$ | $[\text{K}(\text{18-c-6})] \cdot \mathbf{1}^- \cdot (\text{THF})_2$ |
|-----------------------------------------|--------------------------------------------------------------------------------------|---------------------------------------------------------------------|
| Formula                                 | C <sub>65</sub> H <sub>40</sub> AlCl <sub>2</sub> F <sub>36</sub> O <sub>4</sub>     | C <sub>68</sub> H <sub>78</sub> KO <sub>8</sub>                     |
| M/g mol <sup>-1</sup>                   | 1666.85                                                                              | 1062.40                                                             |
| Crystal system                          | Triclinic                                                                            | Monoclinic                                                          |
| Space group                             | <i>P</i> -1                                                                          | <i>P</i> 21/ <i>c</i>                                               |
| <i>a</i> , Å                            | 11.206(2)                                                                            | 14.6441(10)                                                         |
| <i>b</i> , Å                            | 14.384(3)                                                                            | 16.7198(11)                                                         |
| <i>c</i> , Å                            | 22.981(4)                                                                            | 11.8214(9)                                                          |
| <i>α</i> , deg                          | 72.206(6)                                                                            |                                                                     |
| <i>β</i> , deg                          | 78.785(6)                                                                            | 91.187(3)                                                           |
| <i>γ</i> , deg                          | 70.084(7)                                                                            |                                                                     |
| <i>V</i> , Å <sup>3</sup>               | 3299.0(11)                                                                           | 2893.8(4)                                                           |
| <i>Z</i>                                | 2                                                                                    | 2                                                                   |
| Temperature, K                          | 193(2)                                                                               | 193(2)                                                              |
| <i>R</i> 1 ( <i>I</i> > 2σ( <i>I</i> )) | 0.0709                                                                               | 0.0606                                                              |
| <i>wR</i> 2 (all data)                  | 0.2185                                                                               | 0.1804                                                              |

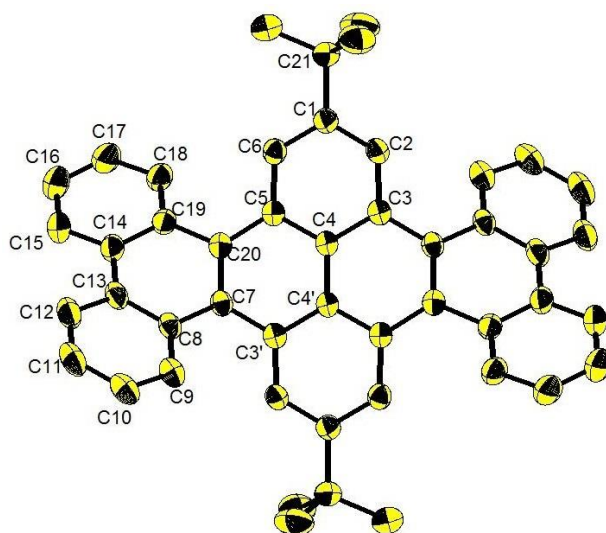

**Fig. S1** Stick and Thermal ellipsoid (50%) drawing of  $\mathbf{1}^{\cdot+}$  in  $[\text{K}(\text{18-c-6})] \cdot \mathbf{1}^{\cdot+} \cdot (\text{THF})_2$ . Yellow C. Hydrogen atoms are omitted for clarity. Selected bond distances ( $\text{\AA}$ ) and angles (deg): C1–C2 1.390(3), C2–C3 1.411(3), C3–C4 1.426(3), C4–C5 1.424(3), C5–C6 1.416(3), C1–C6 1.385(3), C5–C20 1.433(3), C20–C7 1.413(3), C7–C3' 1.443(3), C4–C4' 1.432(5), C19–C20 1.461(3), C19–C14 1.413(4), C18–C19 1.410(4), C17–C18 1.383(4), C16–C17 1.377(5), C15–C16 1.375(5), C14–C15 1.407(4), C13–C14 1.450(4), C8–C13 1.416(4), C8–C9 1.409(4), C9–C10 1.375(4), C10–C11 1.379(4), C11–C12 1.370(4), C12–C13 1.406(4), C7–C8 1.459(3), C5–C20–C7 119.6(2), C20–C7–C3' 118.9(2), C3'–C4'–C4 120.1(3), C4'–C4–C5 120.2(3), C4–C5–C20 118.8(2), C19–C20–C7 117.4(2), C20–C7–C8 117.6(2), C7–C8–C13 119.6(2), C8–C13–C14 119.0(2), C13–C14–C19 118.8(2), C14–C19–C20 119.7(2).

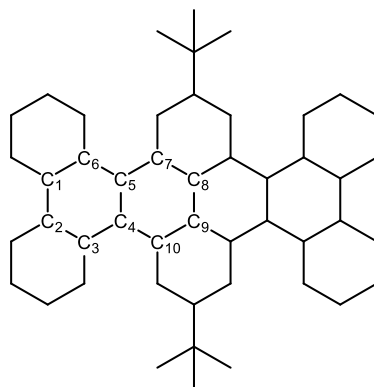

**Table S2.** Structure parameters of **1**, **1<sup>+</sup>** and **1<sup>-</sup>**.

|        | <b>1</b> <sub>x-ray</sub> | <b>1</b> <sub>cal</sub> | <b>1<sup>+</sup></b> <sub>x-ray</sub> | <b>1<sup>+</sup></b> <sub>cal</sub> | <b>1<sup>-</sup></b> <sub>x-ray</sub> | <b>1<sup>-</sup></b> <sub>cal</sub> |
|--------|---------------------------|-------------------------|---------------------------------------|-------------------------------------|---------------------------------------|-------------------------------------|
| C1-C2  | 1.452                     | 1.457                   | 1.455                                 | 1.463                               | 1.450                                 | 1.462                               |
| C2-C3  | 1.417                     | 1.415                   | 1.427                                 | 1.416                               | 1.416                                 | 1.418                               |
| C3-C4  | 1.465                     | 1.463                   | 1.457                                 | 1.455                               | 1.459                                 | 1.463                               |
| C4-C5  | 1.394                     | 1.386                   | 1.403                                 | 1.410                               | 1.413                                 | 1.413                               |
| C5-C6  | 1.466                     | 1.464                   | 1.463                                 | 1.457                               | 1.461                                 | 1.460                               |
| C1-C6  | 1.417                     | 1.415                   | 1.415                                 | 1.416                               | 1.413                                 | 1.419                               |
| C5-C7  | 1.455                     | 1.462                   | 1.446                                 | 1.441                               | 1.433                                 | 1.441                               |
| C7-C8  | 1.418                     | 1.416                   | 1.418                                 | 1.416                               | 1.424                                 | 1.429                               |
| C8-C9  | 1.428                     | 1.429                   | 1.414                                 | 1.417                               | 1.432                                 | 1.431                               |
| C9-C10 | 1.420                     | 1.418                   | 1.420                                 | 1.417                               | 1.426                                 | 1.427                               |
| C10-C4 | 1.459                     | 1.462                   | 1.451                                 | 1.443                               | 1.443                                 | 1.437                               |

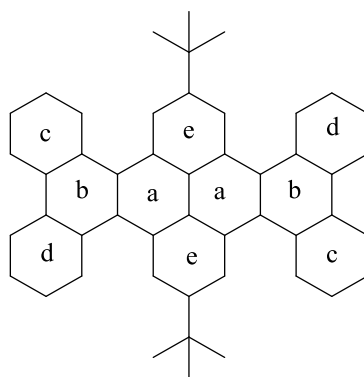

**Table S3.** The HOMA index in **1**, **1<sup>+</sup>** and **1<sup>-</sup>**.

|   | <b>1</b> <sub>x-ray</sub> | <b>1</b> <sub>cal</sub> | <b>1<sup>+</sup></b> <sub>x-ray</sub> | <b>1<sup>+</sup></b> <sub>cal</sub> | <b>1<sup>-</sup></b> | <b>1<sup>-</sup></b> <sub>cal</sub> |
|---|---------------------------|-------------------------|---------------------------------------|-------------------------------------|----------------------|-------------------------------------|
| a | 0.441                     | 0.385                   | 0.567                                 | 0.627                               | 0.552                | 0.537                               |
| b | 0.237                     | 0.240                   | 0.256                                 | 0.270                               | 0.300                | 0.195                               |
| c | 0.905                     | 0.911                   | 0.902                                 | 0.922                               | 0.922                | 0.908                               |
| d | 0.893                     | 0.911                   | 0.916                                 | 0.924                               | 0.909                | 0.902                               |
| e | 0.903                     | 0.909                   | 0.860                                 | 0.869                               | 0.825                | 0.791                               |

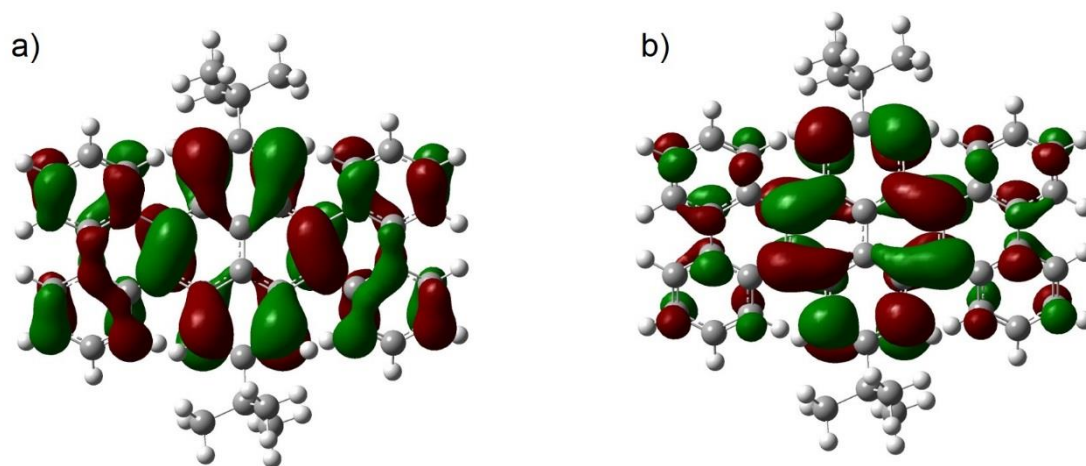

**Fig. S2** The SOMO of  $1^+$  a) and LUMO of  $1^+$  b) calculated at the (U)m062x/6-31G(d) level.

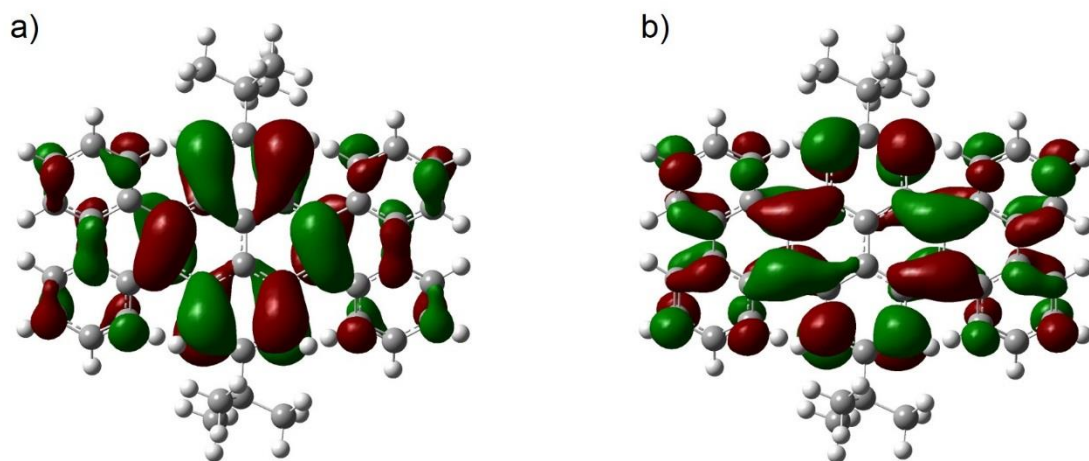

**Fig. S3** The SOMO of  $1^{\cdot-}$  a) and LUMO of  $1^{\cdot-}$  b) calculated at the (U)m062x/6-31G(d) level.



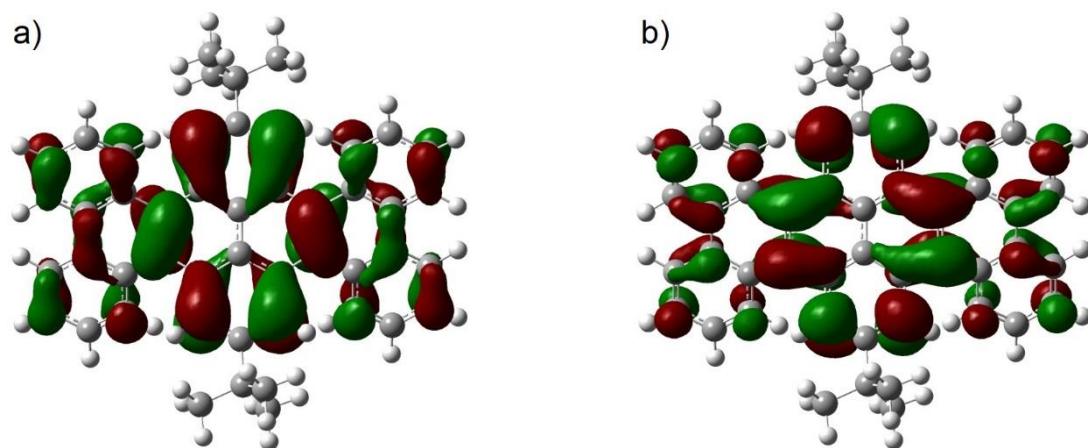

**Fig. S4** The HOMO (isoval = 0.02) a) and LUMO of **1** b) calculated at the (U)m062x/6-31G(d) level.

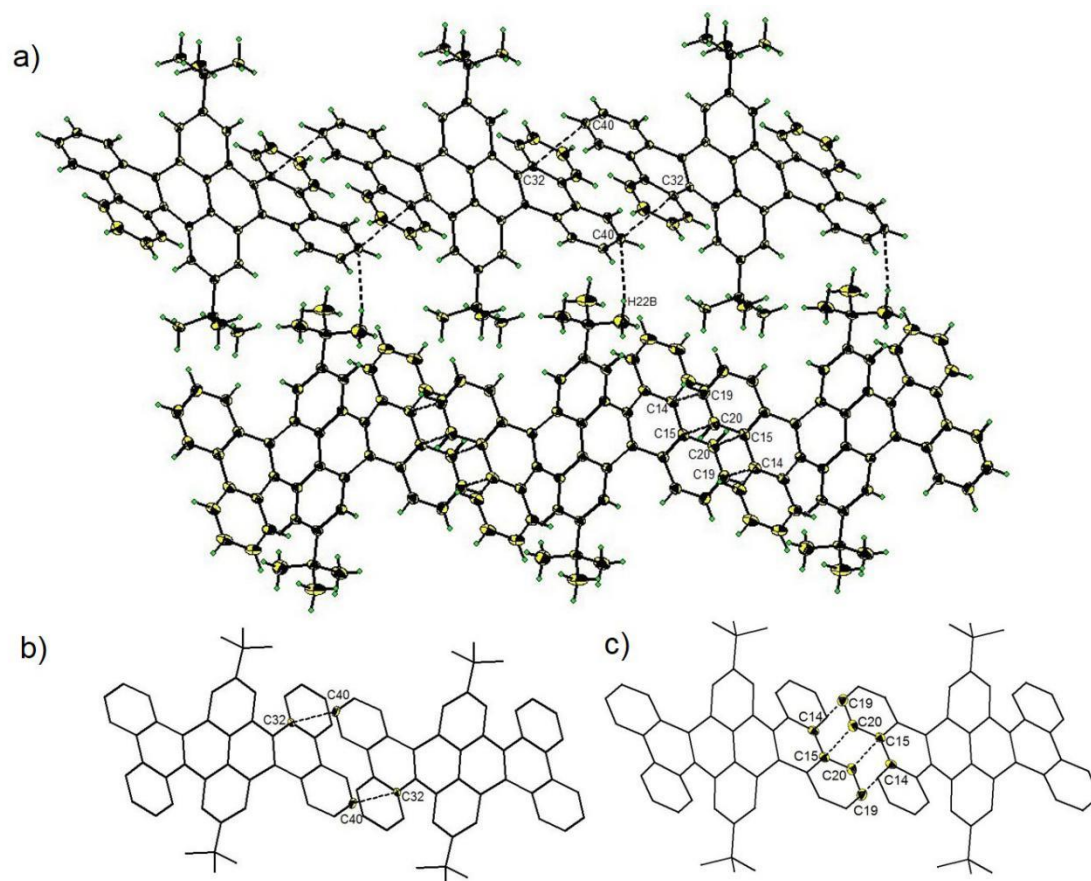

**Fig. S5** a) Depiction of the polymer structure  $(1^+)_n$ . b), c) Two types of side-views of intermolecular  $C \cdots C$   $\pi$  interactions. Selected bond distances ( $\text{\AA}$ ):  $C32 \cdots C40$  3.400(3),  $C14 \cdots C19$  3.554(5),  $C15 \cdots C20$  3.555(4),  $C40 \cdots H22B$  2.849(2).

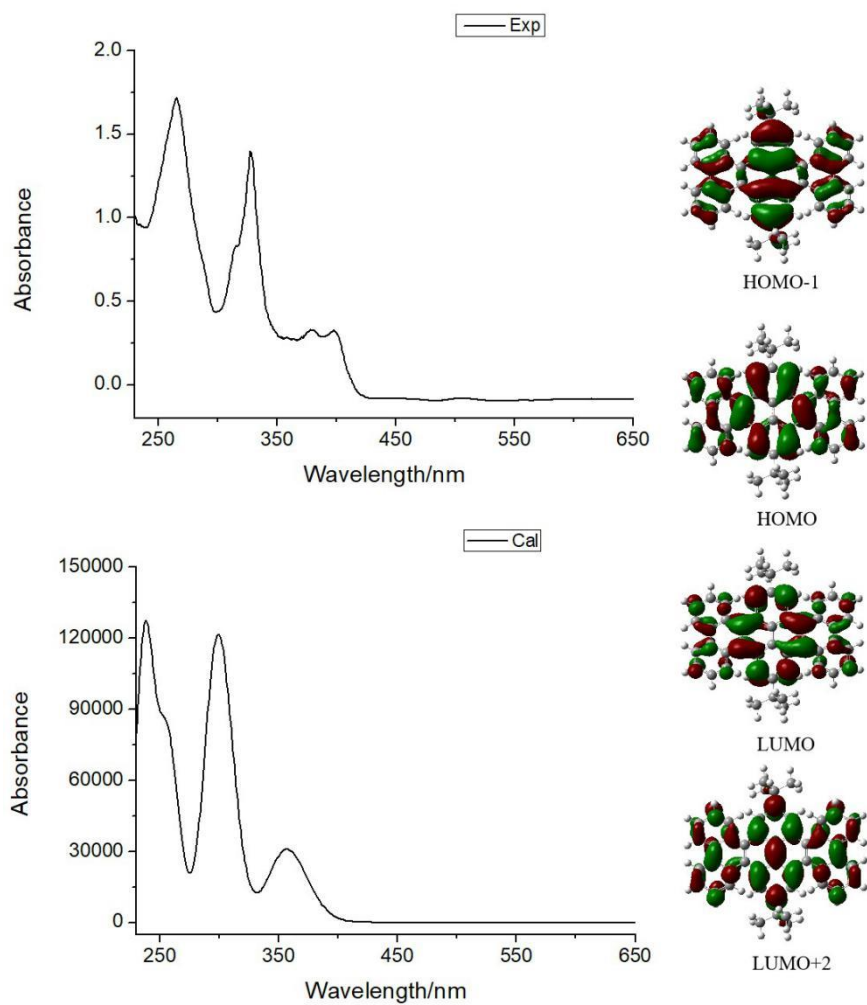

**Fig. S6** Absorption spectrum of  $1.0 \times 10^{-4}$  M **1** in  $\text{CH}_2\text{Cl}_2$  at 25 °C (top) and calculated absorption spectrum of **1** (bottom), together with related molecular orbitals.

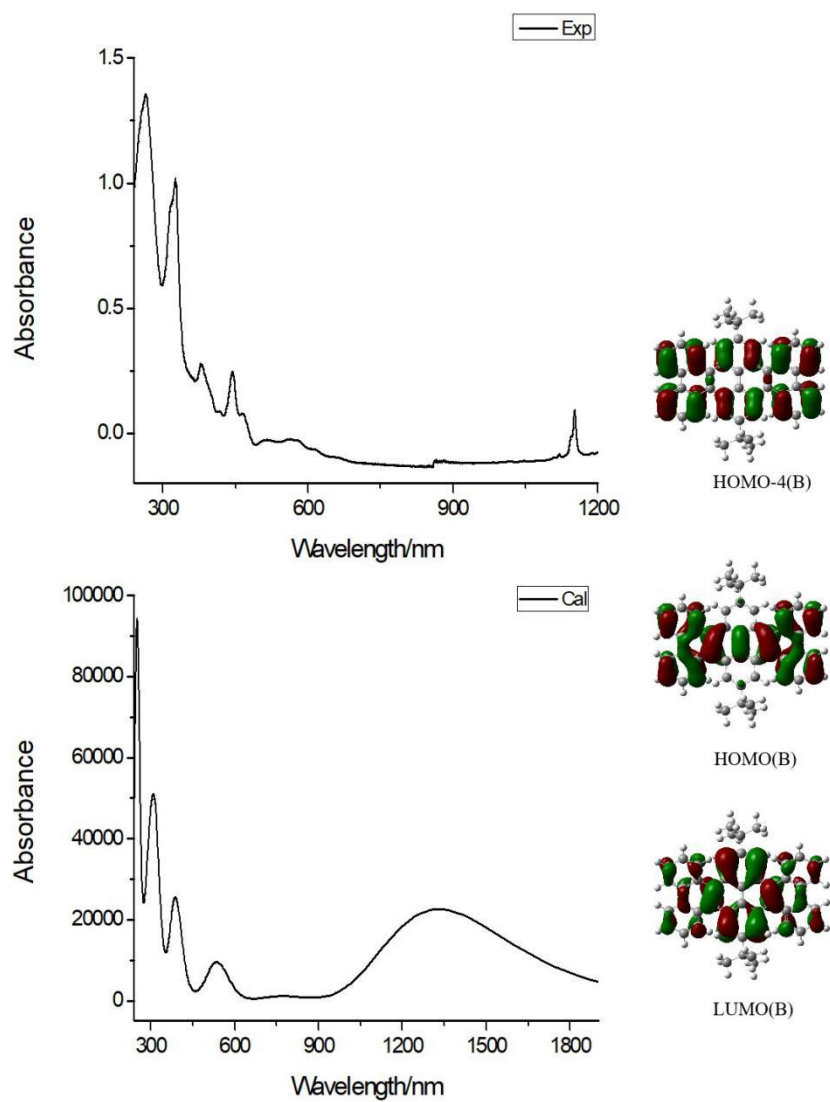

**Fig. S7** Absorption spectrum of  $1.0 \times 10^{-4}$  M  $1^+[\text{Al}(\text{OC}(\text{CF}_3)_3)_4]^-$  in  $\text{CH}_2\text{Cl}_2$  at 25 °C (top) and calculated absorption spectrum of  $1^+$  (bottom), together with related molecular orbitals.

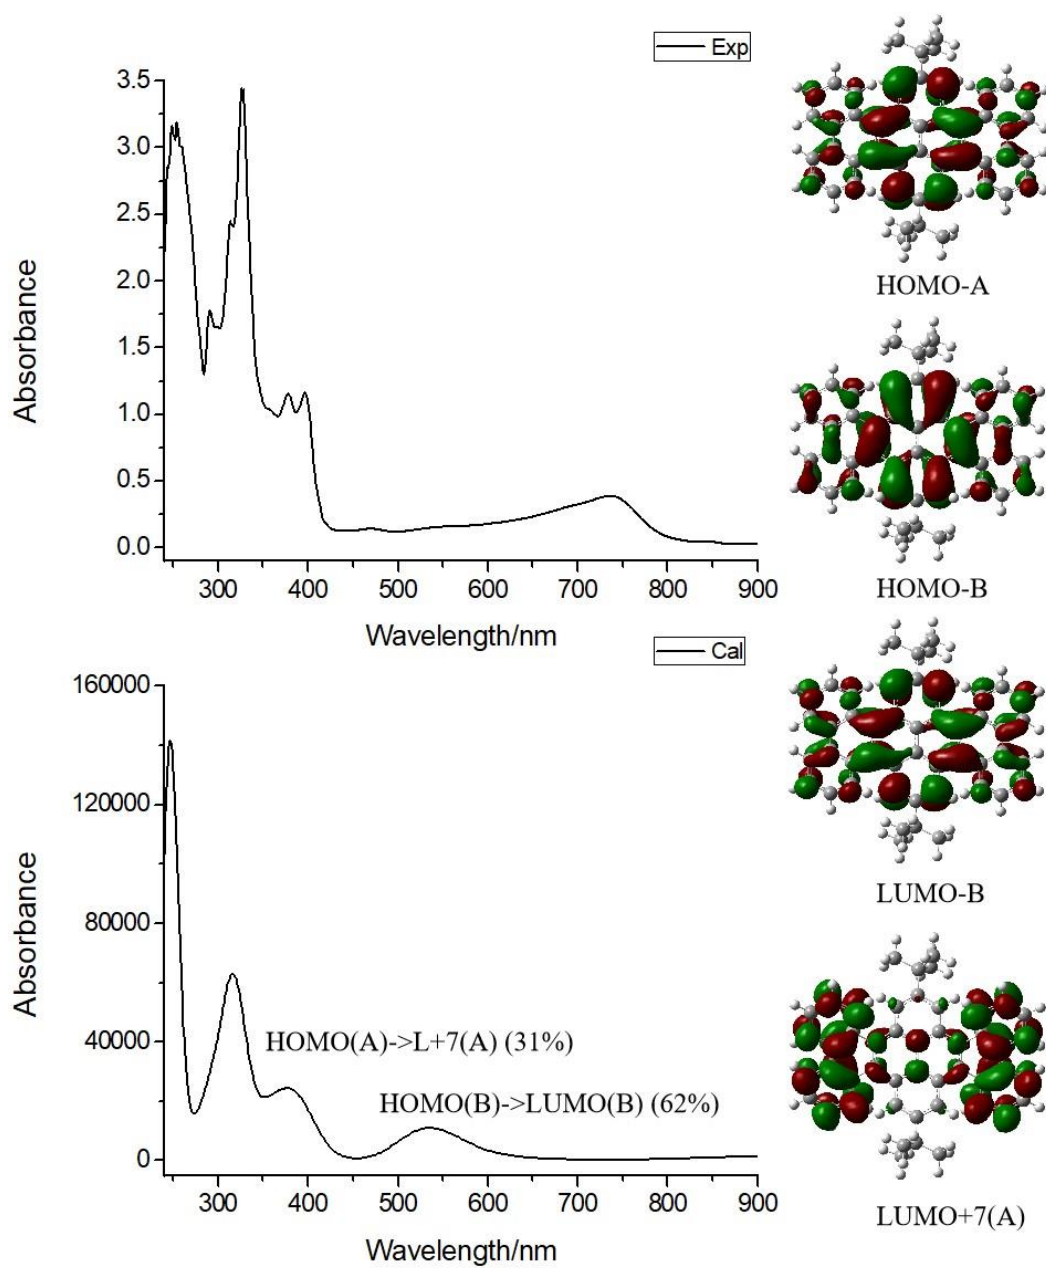

**Fig. S8** Absorption spectrum of  $1.0 \times 10^{-4}$  M  $[\text{K}(18\text{-c-}6)]\cdot\mathbf{1}^-$  in THF at 25 °C (top) and calculated absorption spectrum of  $\mathbf{1}^-$  (bottom), together with related molecular orbitals.

### SQUID Magnetic Studies:

The electronic coupling interaction between the radicals  $\mathbf{1}^+\cdot[\text{Al}(\text{OC}(\text{CF}_3)_3)_4]^-$  and  $[\text{K}(18\text{-c-}6)]\cdot\mathbf{1}^-$  were evaluated by careful fitting of the fitted with the SQUID data ( $\chi_M T$ - $T$ ) with 1-D antiferromagnetic spin-1/2 chain model.<sup>[S3]</sup>

$$\hat{H} = -2J \sum_{i=1}^{n/2} (\hat{S}_{2i}\hat{S}_{2i-1} + \alpha\hat{S}_{2i}\hat{S}_{2i+1})$$

where  $J$  is the exchange integral between a spin and its right neighbor and  $\alpha J$  is the exchange integral between a spin and its left neighbor. When  $\alpha = 0$ , the model reduces to the dimer model. When  $\alpha = 1$ , the model reduces to the regular linear-chain model.

1. The  $\chi_M T$  vs.  $T$  data of  $\mathbf{1}^+\cdot[\text{Al}(\text{OC}(\text{CF}_3)_3)_4]^-$  was fitted with a coefficient of determination  $R^2 = 98.0$  %. The parameters are fitted with  $g = 2.002$ ,  $\alpha = 1$  and  $J = 2.2511 \text{ cm}^{-1} = -6.44 \text{ cal/mol}$ .

2. The  $\chi_M T$  vs.  $T$  data of  $[\text{K}(18\text{-c-}6)]\cdot\mathbf{1}^-$  was fitted with a coefficient of determination  $R^2 = 98.1$  %. The parameters are fitted with  $g = 2.001$ ,  $\alpha = 1$  and  $J = 0.07671 \text{ cm}^{-1} = -0.22 \text{ cal/mol}$ .

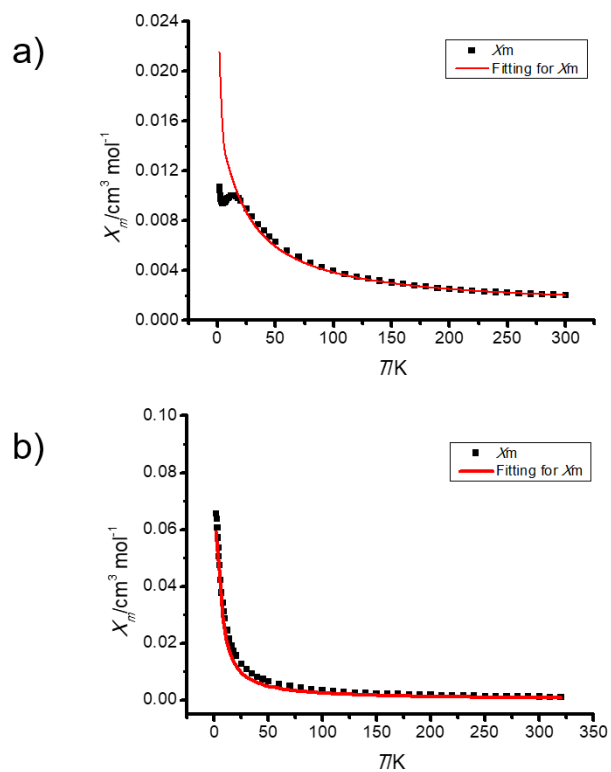

**Fig. S9** The temperature-dependence of magnetic susceptibility  $\chi_M$ - $T$  plots for the crystallite sample of a)  $1^+ \cdot [\text{Al}(\text{OC}(\text{CF}_3)_3)_4]^-$  and b)  $[\text{K}(18\text{-c-}6)] \cdot 1^-$  in 2–300 K under 1000 Oe DC field and the fitting result (red curves).

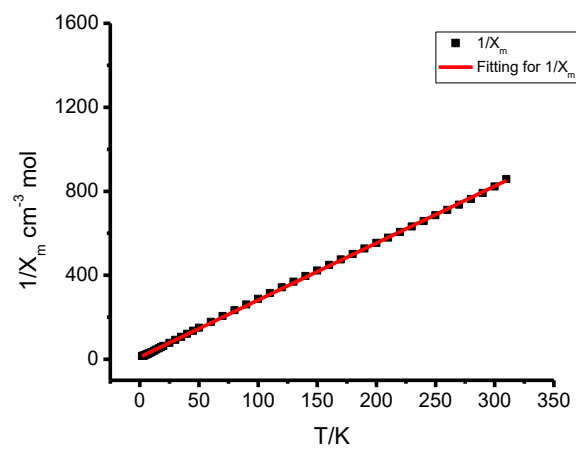

**Fig. S10**  $\chi_M^{-1}$ - $T$  plots of  $[\text{K}(18\text{-c-}6)]\cdot\text{I}^-$  and the fitting results (red line) using Curie-Weiss law.



**Computational details:**

All calculations were performed with the Gaussian 09 program suite.<sup>[S3]</sup> The geometry optimizations were carried out at the Um062x/6-31G(d) level of theory. The obtained stationary points were characterized by frequency calculations. The UV-vis absorption spectra were calculated using time-dependent DFT (TD-DFT) method at the level of (U)cam-b3lyp/6-31G(d) and polarized continuum model (PCM) was adopted to consider solvent effects.

Mulliken spin densities for the optimized geometry of  $\mathbf{1}^{++}$  (Um062x/6-31G(d) level).

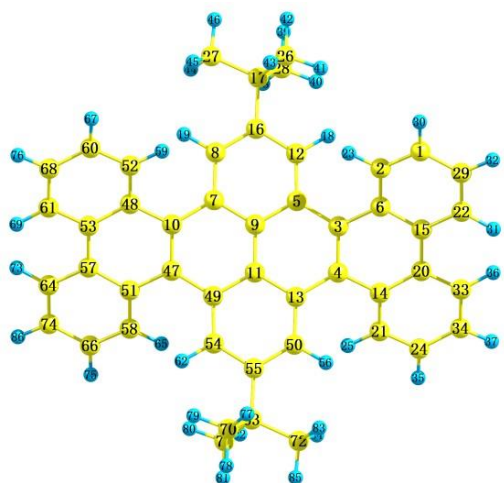

|    |   |           |    |   |           |    |   |           |
|----|---|-----------|----|---|-----------|----|---|-----------|
| 1  | C | -0.016241 | 31 | H | 0.000097  | 61 | C | -0.002303 |
| 2  | C | 0.041119  | 32 | H | -0.001723 | 62 | H | -0.010120 |
| 3  | C | 0.102227  | 33 | C | -0.002302 | 63 | C | 0.003384  |
| 4  | C | 0.082244  | 34 | C | 0.029468  | 64 | C | -0.005981 |
| 5  | C | -0.041973 | 35 | H | 0.000401  | 65 | H | -0.003374 |
| 6  | C | -0.022013 | 36 | H | -0.000044 | 66 | C | -0.016241 |
| 7  | C | -0.022762 | 37 | H | -0.001408 | 67 | H | 0.000401  |
| 8  | C | 0.173431  | 38 | H | -0.000040 | 68 | C | 0.029468  |
| 9  | C | 0.001078  | 39 | H | -0.000126 | 69 | H | -0.000044 |
| 10 | C | 0.082243  | 40 | H | 0.000124  | 70 | C | -0.001100 |
| 11 | C | 0.001079  | 41 | H | 0.000170  | 71 | C | -0.001024 |
| 12 | C | 0.208522  | 42 | H | -0.000056 | 72 | C | 0.000205  |
| 13 | C | -0.022762 | 43 | H | -0.000037 | 73 | H | 0.000097  |
| 14 | C | -0.018788 | 44 | H | -0.000038 | 74 | C | 0.036349  |
| 15 | C | 0.021039  | 45 | H | -0.000032 | 75 | H | 0.000535  |
| 16 | C | -0.077146 | 46 | H | -0.000060 | 76 | H | -0.001408 |
| 17 | C | 0.003384  | 47 | C | 0.102228  | 77 | H | -0.000040 |
| 18 | H | -0.010120 | 48 | C | -0.018788 | 78 | H | -0.000126 |
| 19 | H | -0.008357 | 49 | C | -0.041973 | 79 | H | 0.000124  |
| 20 | C | 0.014390  | 50 | C | 0.173431  | 80 | H | 0.000170  |
| 21 | C | 0.035624  | 51 | C | -0.022013 | 81 | H | -0.000056 |
| 22 | C | -0.005982 | 52 | C | 0.035624  | 82 | H | -0.000037 |
| 23 | H | -0.003374 | 53 | C | 0.014390  | 83 | H | -0.000038 |
| 24 | C | -0.012690 | 54 | C | 0.208522  | 84 | H | -0.000032 |
| 25 | H | -0.002971 | 55 | C | -0.077146 | 85 | H | -0.000060 |
| 26 | C | -0.001024 | 56 | H | -0.008357 | 86 | H | -0.001723 |
| 27 | C | 0.000205  | 57 | C | 0.021039  |    |   |           |
| 28 | C | -0.001100 | 58 | C | 0.041118  |    |   |           |
| 29 | C | 0.036348  | 59 | H | -0.002971 |    |   |           |
| 30 | H | 0.000535  | 60 | C | -0.012690 |    |   |           |

Mulliken spin densities for the optimized geometry of  $\mathbf{1}^+$  (Um062x/6-31G(d) level).

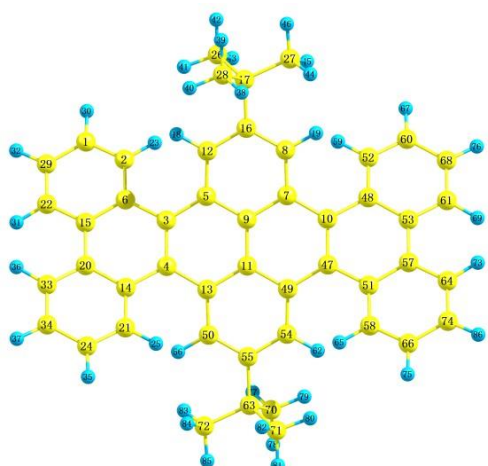

|    |   |           |    |   |           |    |   |           |
|----|---|-----------|----|---|-----------|----|---|-----------|
| 1  | C | -0.013860 | 31 | H | 0.000242  | 61 | C | -0.002392 |
| 2  | C | 0.030035  | 32 | H | -0.001627 | 62 | H | -0.009067 |
| 3  | C | 0.113256  | 33 | C | -0.002392 | 63 | C | 0.003007  |
| 4  | C | 0.094226  | 34 | C | 0.022766  | 64 | C | -0.006870 |
| 5  | C | -0.029613 | 35 | H | 0.000496  | 65 | H | -0.000662 |
| 6  | C | -0.020584 | 36 | H | 0.000075  | 66 | C | -0.013860 |
| 7  | C | -0.008470 | 37 | H | -0.001188 | 67 | H | 0.000496  |
| 8  | C | 0.155430  | 38 | H | -0.000142 | 68 | C | 0.022766  |
| 9  | C | -0.006865 | 39 | H | -0.000218 | 69 | H | 0.000075  |
| 10 | C | 0.094229  | 40 | H | 0.000237  | 70 | C | 0.000342  |
| 11 | C | -0.006865 | 41 | H | 0.000220  | 71 | C | -0.000057 |
| 12 | C | 0.186273  | 42 | H | -0.000111 | 72 | C | 0.000337  |
| 13 | C | -0.008469 | 43 | H | -0.000151 | 73 | H | 0.000242  |
| 14 | C | -0.017185 | 44 | H | 0.000241  | 74 | C | 0.031546  |
| 15 | C | 0.020942  | 45 | H | 0.000303  | 75 | H | 0.000653  |
| 16 | C | -0.059816 | 46 | H | -0.000134 | 76 | H | -0.001188 |
| 17 | C | 0.003007  | 47 | C | 0.113256  | 77 | H | -0.000142 |
| 18 | H | -0.009067 | 48 | C | -0.017185 | 78 | H | -0.000218 |
| 19 | H | -0.007309 | 49 | C | -0.029613 | 79 | H | 0.000237  |
| 20 | C | 0.012378  | 50 | C | 0.155430  | 80 | H | 0.000220  |
| 21 | C | 0.024496  | 51 | C | -0.020584 | 81 | H | -0.000111 |
| 22 | C | -0.006871 | 52 | C | 0.024495  | 82 | H | -0.000151 |
| 23 | H | -0.000662 | 53 | C | 0.012378  | 83 | H | 0.000241  |
| 24 | C | -0.010201 | 54 | C | 0.186274  | 84 | H | 0.000303  |
| 25 | H | -0.000981 | 55 | C | -0.059816 | 85 | H | -0.000134 |
| 26 | C | -0.000057 | 56 | H | -0.007309 | 86 | H | -0.001627 |
| 27 | C | 0.000337  | 57 | C | 0.020942  |    |   |           |
| 28 | C | 0.000343  | 58 | C | 0.030035  |    |   |           |
| 29 | C | 0.031546  | 59 | H | -0.000982 |    |   |           |
| 30 | H | 0.000653  | 60 | C | -0.010200 |    |   |           |

Mulliken spin densities for the optimized geometry of  $[K(18-c-6)]\cdot 1^{\bullet-}$  (Um062x/6-31G(d) level).

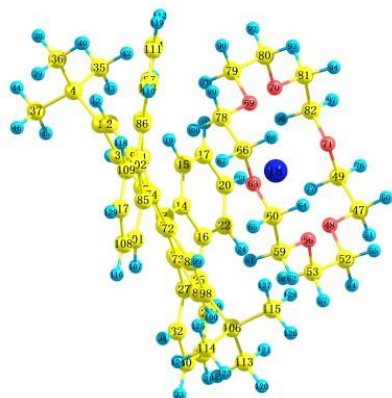

|    |   |           |    |   |           |    |   |           |     |   |           |
|----|---|-----------|----|---|-----------|----|---|-----------|-----|---|-----------|
| 1  | C | -0.018691 | 34 | H | -0.002223 | 67 | H | -0.000915 | 100 | H | -0.006518 |
| 2  | C | 0.061322  | 35 | C | 0.000141  | 68 | H | 0.000026  | 101 | C | 0.009792  |
| 3  | C | 0.096438  | 36 | C | 0.000171  | 69 | O | -0.000332 | 102 | C | 0.008144  |
| 4  | C | 0.001837  | 37 | C | 0.000532  | 70 | O | -0.000443 | 103 | C | 0.001346  |
| 5  | C | -0.036637 | 38 | H | -0.000087 | 71 | O | -0.000738 | 104 | C | -0.000044 |
| 6  | H | -0.004952 | 39 | H | 0.000131  | 72 | C | -0.035049 | 105 | H | 0.000302  |
| 7  | C | -0.011647 | 40 | H | 0.000282  | 73 | C | -0.024166 | 106 | C | 0.002993  |
| 8  | C | 0.158755  | 41 | H | -0.000345 | 74 | C | 0.044004  | 107 | H | -0.000293 |
| 9  | C | 0.025332  | 42 | H | 0.000055  | 75 | C | -0.000568 | 108 | C | -0.004764 |
| 10 | C | 0.032703  | 43 | H | -0.000032 | 76 | H | 0.000039  | 109 | C | -0.003781 |
| 11 | C | 0.003638  | 44 | H | -0.000245 | 77 | H | 0.000423  | 110 | H | -0.000042 |
| 12 | H | -0.002897 | 45 | H | 0.000013  | 78 | C | -0.000513 | 111 | C | 0.000117  |
| 13 | C | 0.193021  | 46 | H | -0.000039 | 79 | C | 0.000344  | 112 | H | 0.000014  |
| 14 | C | -0.006449 | 47 | C | -0.000055 | 80 | C | -0.000142 | 113 | C | 0.000019  |
| 15 | C | 0.082674  | 48 | O | -0.000620 | 81 | C | -0.000150 | 114 | C | -0.000277 |
| 16 | C | 0.059375  | 49 | C | 0.000740  | 82 | C | 0.000826  | 115 | C | -0.000113 |
| 17 | C | -0.039609 | 50 | H | -0.000039 | 83 | C | 0.190105  | 116 | H | 0.000258  |
| 18 | K | 0.010985  | 51 | H | -0.000006 | 84 | C | 0.153219  | 117 | C | 0.008365  |
| 19 | H | -0.003173 | 52 | C | -0.000170 | 85 | C | -0.008623 | 118 | H | 0.000156  |
| 20 | C | 0.113601  | 53 | C | 0.000572  | 86 | C | -0.001531 | 119 | H | -0.000006 |
| 21 | H | 0.001272  | 54 | H | -0.000017 | 87 | C | 0.001285  | 120 | H | -0.000123 |
| 22 | C | -0.020536 | 55 | H | -0.000055 | 88 | H | 0.000620  | 121 | H | 0.000559  |
| 23 | H | -0.006216 | 56 | O | -0.000450 | 89 | H | -0.000005 | 122 | H | 0.000160  |
| 24 | H | 0.000351  | 57 | H | 0.000084  | 90 | H | -0.000026 | 123 | H | -0.000128 |
| 25 | C | 0.011679  | 58 | H | -0.000591 | 91 | H | 0.000798  | 124 | H | -0.000117 |
| 26 | C | 0.003010  | 59 | C | 0.005172  | 92 | H | -0.000004 | 125 | H | 0.000287  |
| 27 | C | -0.028396 | 60 | C | 0.000806  | 93 | H | -0.000032 | 126 | H | -0.000292 |
| 28 | C | 0.030080  | 61 | H | -0.001567 | 94 | H | -0.000031 | 127 | H | 0.000194  |
| 29 | H | -0.000103 | 62 | H | 0.000378  | 95 | H | -0.000002 | 128 | H | 0.000096  |
| 30 | C | -0.010042 | 63 | O | -0.000421 | 96 | H | 0.000329  | 129 | H | -0.000383 |
| 31 | H | -0.001629 | 64 | H | -0.000061 | 97 | H | 0.000035  |     |   |           |
| 32 | C | 0.038401  | 65 | H | -0.000619 | 98 | C | -0.062041 |     |   |           |
| 33 | H | 0.000450  | 66 | C | 0.001406  | 99 | H | -0.009455 |     |   |           |

Coordinates for optimized geometries.

1

|   |             |             |             |
|---|-------------|-------------|-------------|
| C | -4.95717600 | 3.02932100  | 1.68633900  |
| C | -3.77601100 | 2.49077300  | 1.21849900  |
| C | -2.49153600 | 0.64524400  | 0.09805400  |
| C | -2.46963400 | -0.72597300 | -0.09989400 |
| C | -1.24999800 | 1.40267000  | -0.05075000 |
| C | -3.75079800 | 1.27467800  | 0.49718800  |
| C | 1.20328600  | 1.44233100  | -0.04527700 |
| C | 1.15224500  | 2.81408500  | -0.33674800 |
| C | -0.01049200 | 0.71354600  | -0.02984200 |
| C | 2.46963300  | 0.72596300  | 0.09987400  |
| C | 0.01049100  | -0.71355700 | 0.02982700  |
| C | -1.23983600 | 2.77002400  | -0.34408500 |
| C | -1.20328700 | -1.44234200 | 0.04526600  |
| C | -3.71215800 | -1.39290800 | -0.49260000 |
| C | -4.96852600 | 0.57346600  | 0.33341800  |
| C | -0.05358200 | 3.48279000  | -0.52814500 |
| C | -0.12294400 | 4.96161200  | -0.91855700 |
| H | -2.18597200 | 3.27731500  | -0.49420200 |
| H | 2.08372100  | 3.34443000  | -0.47949100 |
| C | -4.95000800 | -0.72945700 | -0.31950700 |
| C | -3.70565300 | -2.60750900 | -1.21651200 |
| C | -6.16104500 | 1.14117600  | 0.82099100  |
| H | -2.84350500 | 2.98522000  | 1.46217800  |
| C | -4.87284400 | -3.18037600 | -1.67877300 |
| H | -2.76022500 | -3.07342100 | -1.46586500 |
| C | -0.92488000 | 5.72977000  | 0.14609900  |
| C | 1.26686000  | 5.59730400  | -1.02499100 |
| C | -0.82518800 | 5.09610200  | -2.27995700 |
| C | -6.16648200 | 2.35836400  | 1.46984500  |
| H | -4.93943900 | 3.95699900  | 2.24983500  |
| H | -7.09331400 | 0.59647300  | 0.72225600  |
| H | -7.09816400 | 2.77058400  | 1.84437400  |
| C | -6.12772700 | -1.33220600 | -0.80053800 |
| C | -6.10058500 | -2.54718100 | -1.45282400 |
| H | -4.83088100 | -4.10611100 | -2.24418800 |
| H | -7.07541600 | -0.81643100 | -0.69376300 |
| H | -7.02180200 | -2.98651000 | -1.82241300 |
| H | -0.27301500 | 4.55664300  | -3.05622600 |
| H | -0.88666800 | 6.15110600  | -2.57057500 |
| H | -1.84280900 | 4.69488900  | -2.24843400 |
| H | -1.95346400 | 5.36200100  | 0.22219900  |
| H | -0.96905700 | 6.79434600  | -0.10981900 |

|   |             |             |             |
|---|-------------|-------------|-------------|
| H | -0.45554400 | 5.63135700  | 1.13072300  |
| H | 1.87308000  | 5.11623600  | -1.79968400 |
| H | 1.81165400  | 5.53980000  | -0.07592700 |
| H | 1.16577000  | 6.65491800  | -1.28948000 |
| C | 2.49153600  | -0.64525500 | -0.09807200 |
| C | 3.71215400  | 1.39290300  | 0.49257200  |
| C | 1.24999800  | -1.40268100 | 0.05074100  |
| C | -1.15224500 | -2.81409100 | 0.33676300  |
| C | 3.75080200  | -1.27468700 | -0.49720400 |
| C | 3.70564300  | 2.60751800  | 1.21646100  |
| C | 4.95000600  | 0.72945400  | 0.31948900  |
| C | 1.23983600  | -2.77003100 | 0.34409700  |
| C | 0.05358300  | -3.48279300 | 0.52817200  |
| H | -2.08371900 | -3.34443400 | 0.47952300  |
| C | 4.96852900  | -0.57347200 | -0.33343000 |
| C | 3.77602000  | -2.49077700 | -1.21852300 |
| H | 2.76021200  | 3.07343500  | 1.46579500  |
| C | 4.87283100  | 3.18039300  | 1.67871900  |
| C | 6.12772200  | 1.33221100  | 0.80051700  |
| H | 2.18597100  | -3.27731900 | 0.49422700  |
| C | 0.12294500  | -4.96160600 | 0.91861300  |
| C | 6.16105000  | -1.14117900 | -0.82100000 |
| H | 2.84351600  | -2.98522300 | -1.46221200 |
| C | 4.95718700  | -3.02932200 | -1.68636100 |
| H | 4.83086400  | 4.10613700  | 2.24411800  |
| C | 6.10057300  | 2.54719500  | 1.45278700  |
| H | 7.07541200  | 0.81643800  | 0.69375100  |
| C | 0.82517500  | -5.09606800 | 2.28002300  |
| C | 0.92489400  | -5.72978200 | -0.14601900 |
| C | -1.26685800 | -5.59730100 | 1.02504500  |
| H | 7.09331800  | -0.59647400 | -0.72226200 |
| C | 6.16649200  | -2.35836500 | -1.46985800 |
| H | 4.93945300  | -3.95699600 | -2.24986300 |
| H | 7.02178900  | 2.98653200  | 1.82237300  |
| H | 0.27299300  | -4.55659500 | 3.05627600  |
| H | 0.88665500  | -6.15106600 | 2.57066200  |
| H | 1.84279600  | -4.69485200 | 2.24850300  |
| H | 1.95347800  | -5.36201000 | -0.22211600 |
| H | 0.96907300  | -6.79435300 | 0.10991900  |
| H | 0.45556900  | -5.63138900 | -1.13065100 |
| H | -1.87308800 | -5.11621900 | 1.79972200  |
| H | -1.81164200 | -5.53981800 | 0.07597300  |
| H | -1.16576800 | -6.65491000 | 1.28955600  |
| H | 7.09817500  | -2.77058200 | -1.84438600 |

I<sup>++</sup>

|   |             |             |             |
|---|-------------|-------------|-------------|
| C | -4.91838100 | 3.03788300  | 1.69462100  |
| C | -3.73579600 | 2.49089300  | 1.23622300  |
| C | -2.47331900 | 0.65652800  | 0.09757900  |
| C | -2.45184600 | -0.73858800 | -0.10420100 |
| C | -1.24645800 | 1.39697200  | -0.06905500 |
| C | -3.72240600 | 1.27645000  | 0.51358500  |
| C | 1.20296200  | 1.43720600  | -0.06369100 |
| C | 1.14980900  | 2.82330500  | -0.35509000 |
| C | -0.00955400 | 0.70652800  | -0.05109400 |
| C | 2.45184500  | 0.73856800  | 0.10416300  |
| C | 0.00955500  | -0.70654900 | 0.05106300  |
| C | -1.23512200 | 2.77543200  | -0.36463300 |
| C | -1.20296300 | -1.43722600 | 0.06367100  |
| C | -3.68763000 | -1.39554800 | -0.50966300 |
| C | -4.93997200 | 0.57348800  | 0.34108300  |
| C | -0.05090500 | 3.50015500  | -0.53574200 |
| C | -0.12287500 | 4.97915900  | -0.92024700 |
| H | -2.18401200 | 3.27171300  | -0.53781400 |
| H | 2.08448500  | 3.34532000  | -0.51451900 |
| C | -4.92342700 | -0.72890500 | -0.32500200 |
| C | -3.67289700 | -2.60751200 | -1.23484300 |
| C | -6.12687800 | 1.14557600  | 0.82207100  |
| H | -2.79947100 | 2.97050300  | 1.49866600  |
| C | -4.84332700 | -3.18641700 | -1.68614800 |
| H | -2.72553000 | -3.06064800 | -1.50384500 |
| C | -0.94259800 | 5.73237600  | 0.14201700  |
| C | 1.26816800  | 5.61513000  | -1.00282600 |
| C | -0.80959600 | 5.11287700  | -2.29000800 |
| C | -6.12480600 | 2.36799900  | 1.47091100  |
| H | -4.90293100 | 3.96349100  | 2.26011100  |
| H | -7.06469200 | 0.61246900  | 0.71858200  |
| H | -7.05630700 | 2.78266400  | 1.84190200  |
| C | -6.09783300 | -1.33325000 | -0.79732600 |
| C | -6.06664700 | -2.55276300 | -1.45045400 |
| H | -4.80618100 | -4.11018500 | -2.25367300 |
| H | -7.04944500 | -0.82737100 | -0.68354200 |
| H | -6.98903900 | -2.99308200 | -1.81459100 |
| H | -0.24757200 | 4.58130400  | -3.06434200 |
| H | -0.86961500 | 6.16848500  | -2.57412800 |
| H | -1.82892400 | 4.71395100  | -2.27410100 |
| H | -1.97206900 | 5.36287900  | 0.20182700  |
| H | -0.98948300 | 6.79651600  | -0.11006400 |
| H | -0.48537000 | 5.63514500  | 1.13229600  |

|   |             |             |             |
|---|-------------|-------------|-------------|
| H | 1.88296300  | 5.15059600  | -1.78111200 |
| H | 1.80278600  | 5.54799600  | -0.04832700 |
| H | 1.16816700  | 6.67540200  | -1.25206200 |
| C | 2.47332000  | -0.65654800 | -0.09761500 |
| C | 3.68762500  | 1.39553700  | 0.50961600  |
| C | 1.24645900  | -1.39699200 | 0.06903600  |
| C | -1.14980800 | -2.82331600 | 0.35511800  |
| C | 3.72241200  | -1.27646400 | -0.51362600 |
| C | 3.67288200  | 2.60752000  | 1.23476100  |
| C | 4.92342300  | 0.72889500  | 0.32497000  |
| C | 1.23512300  | -2.77544200 | 0.36466100  |
| C | 0.05090500  | -3.50015800 | 0.53579400  |
| H | -2.08448200 | -3.34532400 | 0.51457600  |
| C | 4.93997600  | -0.57349900 | -0.34111100 |
| C | 3.73581000  | -2.49089200 | -1.23628900 |
| H | 2.72551000  | 3.06066400  | 1.50373300  |
| C | 4.84330700  | 3.18643700  | 1.68606400  |
| C | 6.09782500  | 1.33325200  | 0.79729200  |
| H | 2.18401100  | -3.27171700 | 0.53787000  |
| C | 0.12287500  | -4.97914700 | 0.92035900  |
| C | 6.12688700  | -1.14557900 | -0.82209700 |
| H | 2.79949000  | -2.97049600 | -1.49875800 |
| C | 4.91840000  | -3.03787300 | -1.69468600 |
| H | 4.80615500  | 4.11022000  | 2.25356400  |
| C | 6.06662900  | 2.55277800  | 1.45039600  |
| H | 7.04944000  | 0.82737600  | 0.68352000  |
| C | 0.80957500  | -5.11280900 | 2.29013600  |
| C | 0.94261700  | -5.73240200 | -0.14186300 |
| C | -1.26816800 | -5.61511900 | 1.00294100  |
| H | 7.06469800  | -0.61246900 | -0.71859900 |
| C | 6.12482300  | -2.36799300 | -1.47095400 |
| H | 4.90295500  | -3.96347100 | -2.26019400 |
| H | 6.98901900  | 2.99310700  | 1.81453000  |
| H | 0.24753800  | -4.58120800 | 3.06444000  |
| H | 0.86959300  | -6.16840600 | 2.57429700  |
| H | 1.82890200  | -4.71388000 | 2.27422900  |
| H | 1.97208700  | -5.36290200 | -0.20167100 |
| H | 0.98950300  | -6.79653200 | 0.11025900  |
| H | 0.48540500  | -5.63521100 | -1.13215300 |
| H | -1.88297600 | -5.15055600 | 1.78119800  |
| H | -1.80277000 | -5.54802600 | 0.04843000  |
| H | -1.16816600 | -6.67538100 | 1.25222000  |
| H | 7.05632700  | -2.78265000 | -1.84194600 |



I\*

|   |             |             |             |
|---|-------------|-------------|-------------|
| C | -4.94817900 | -3.06030400 | -1.66365800 |
| C | -3.76868500 | -2.52652600 | -1.18255900 |
| C | -2.47596500 | -0.67397300 | -0.07006500 |
| C | -2.45886600 | 0.73041900  | 0.08690500  |
| C | -1.25026700 | -1.41490600 | 0.08858500  |
| C | -3.73148500 | -1.29802600 | -0.47811700 |
| C | 1.22017300  | -1.44166700 | 0.06965800  |
| C | 1.17127300  | -2.83490100 | 0.34388800  |
| C | -0.00646000 | -0.71315200 | 0.05449700  |
| C | 2.45886700  | -0.73042900 | -0.08693300 |
| C | 0.00646200  | 0.71314000  | -0.05451500 |
| C | -1.22740900 | -2.80003200 | 0.36339600  |
| C | -1.22017100 | 1.44165500  | -0.06967600 |
| C | -3.70626100 | 1.38247200  | 0.48438500  |
| C | -4.95590500 | -0.59452800 | -0.33747500 |
| C | -0.03120400 | -3.50182300 | 0.52127500  |
| C | -0.09049500 | -4.98606600 | 0.89923000  |
| H | -2.16819300 | -3.30738500 | 0.54263300  |
| H | 2.10523600  | -3.35442400 | 0.50577100  |
| C | -4.94453200 | 0.71073600  | 0.32052400  |
| C | -3.72099800 | 2.60494400  | 1.19781700  |
| C | -6.14234600 | -1.15352300 | -0.84156900 |
| H | -2.83738800 | -3.03759300 | -1.39516600 |
| C | -4.89360200 | 3.16816700  | 1.66304100  |
| H | -2.77964200 | 3.08944600  | 1.42740000  |
| C | -0.91895800 | -5.74655500 | -0.14987500 |
| C | 1.29871500  | -5.62904300 | 0.96349200  |
| C | -0.75619500 | -5.13829700 | 2.27666100  |
| C | -6.15603300 | -2.37874900 | -1.48157100 |
| H | -4.92605900 | -3.99871900 | -2.21138200 |
| H | -7.06893500 | -0.59393600 | -0.76173500 |
| H | -7.08672800 | -2.78557200 | -1.86631300 |
| C | -6.12388800 | 1.29793800  | 0.80959600  |
| C | -6.11514700 | 2.51946100  | 1.45660200  |
| H | -4.85621500 | 4.10257200  | 2.21660700  |
| H | -7.06346600 | 0.76353800  | 0.71212700  |
| H | -7.04100900 | 2.94796900  | 1.82943300  |
| H | -0.18148700 | -4.60326400 | 3.03997900  |
| H | -0.81111400 | -6.19680700 | 2.56176300  |
| H | -1.77146800 | -4.73090200 | 2.27431600  |
| H | -1.94652800 | -5.37292200 | -0.19929800 |
| H | -0.95819700 | -6.81563800 | 0.09471300  |
| H | -0.47184900 | -5.63495800 | -1.14364100 |

|   |             |             |             |
|---|-------------|-------------|-------------|
| H | 1.92172900  | -5.16241100 | 1.73332900  |
| H | 1.82302000  | -5.54459900 | 0.00513700  |
| H | 1.20216400  | -6.69366100 | 1.20648900  |
| C | 2.47596400  | 0.67396100  | 0.07005400  |
| C | 3.70626400  | -1.38246900 | -0.48443600 |
| C | 1.25026700  | 1.41489600  | -0.08859100 |
| C | -1.17127300 | 2.83489400  | -0.34387600 |
| C | 3.73148000  | 1.29800900  | 0.47812400  |
| C | 3.72100800  | -2.60490900 | -1.19792200 |
| C | 4.94453300  | -0.71073300 | -0.32055300 |
| C | 1.22740900  | 2.80002600  | -0.36338300 |
| C | 0.03120300  | 3.50182000  | -0.52125000 |
| H | -2.10523900 | 3.35442000  | -0.50574000 |
| C | 4.95590100  | 0.59451500  | 0.33747700  |
| C | 3.76867500  | 2.52649700  | 1.18258800  |
| H | 2.77965700  | -3.08940100 | -1.42754100 |
| C | 4.89361600  | -3.16811100 | -1.66316400 |
| C | 6.12389300  | -1.29791400 | -0.80964000 |
| H | 2.16819200  | 3.30738200  | -0.54260900 |
| C | 0.09049600  | 4.98607100  | -0.89917400 |
| C | 6.14233800  | 1.15350200  | 0.84158800  |
| H | 2.83737600  | 3.03755900  | 1.39519800  |
| C | 4.94816600  | 3.06026700  | 1.66370500  |
| H | 4.85623300  | -4.10249300 | -2.21676900 |
| C | 6.11515900  | -2.51941300 | -1.45669000 |
| H | 7.06346900  | -0.76351300 | -0.71215200 |
| C | 0.75619100  | 5.13833100  | -2.27660400 |
| C | 0.91896300  | 5.74653600  | 0.14994500  |
| C | -1.29871300 | 5.62905200  | -0.96341700 |
| H | 7.06892900  | 0.59391800  | 0.76174800  |
| C | 6.15602100  | 2.37871500  | 1.48161300  |
| H | 4.92604100  | 3.99867200  | 2.21144500  |
| H | 7.04102400  | -2.94790500 | -1.82953500 |
| H | 0.18148000  | 4.60331500  | -3.03993100 |
| H | 0.81111000  | 6.19684700  | -2.56168300 |
| H | 1.77146400  | 4.73093500  | -2.27427000 |
| H | 1.94653300  | 5.37290000  | 0.19935600  |
| H | 0.95820300  | 6.81562400  | -0.09462000 |
| H | 0.47185700  | 5.63491700  | 1.14371000  |
| H | -1.92173200 | 5.16243800  | -1.73326300 |
| H | -1.82301600 | 5.54458900  | -0.00506200 |
| H | -1.20216100 | 6.69367500  | -1.20639200 |
| H | 7.08671300  | 2.78553300  | 1.86636800  |

[K(18-c-6)]·1<sup>-</sup>

|   |             |             |             |
|---|-------------|-------------|-------------|
| C | 1.34859500  | -2.99958200 | 2.27193400  |
| C | 2.41786800  | -2.66117800 | 1.46238700  |
| C | 0.32478100  | -2.05569900 | 2.45701500  |
| C | 1.22327100  | -4.37099600 | 2.93869800  |
| C | 0.37495500  | -0.77702900 | 1.89424200  |
| H | -0.51907900 | -2.30612000 | 3.09096200  |
| C | 1.57661800  | -0.38305400 | 1.22845300  |
| C | -0.73608600 | 0.15525000  | 1.92991200  |
| C | 2.54168300  | -1.36617300 | 0.89796700  |
| C | 1.76698400  | 0.98271700  | 0.84617100  |
| C | 3.68058100  | -0.98782900 | 0.08483000  |
| H | 3.22885000  | -3.36221400 | 1.32037800  |
| C | -0.44135400 | 1.54920600  | 1.80529300  |
| C | -2.10702000 | -0.27138800 | 1.89284100  |
| C | -2.51917500 | -1.61676100 | 1.63165300  |
| C | -3.15902600 | 0.70732900  | 1.95094300  |
| C | -3.84402700 | -1.96910200 | 1.45368900  |
| K | -3.16673700 | -0.48595200 | -1.17871800 |
| H | -1.76805500 | -2.38866400 | 1.52988900  |
| C | -4.85250800 | -0.99634900 | 1.48736000  |
| H | -4.08935800 | -3.00673600 | 1.23929100  |
| C | -4.48616800 | 0.32701200  | 1.71921900  |
| H | -5.89756500 | -1.26512500 | 1.36788200  |
| H | -5.25938900 | 1.09015800  | 1.71522500  |
| C | -2.81248600 | 2.08056100  | 2.33665400  |
| C | -3.78163200 | 2.97971000  | 2.81246600  |
| C | -1.45529300 | 2.48628600  | 2.28156600  |
| C | -3.44493500 | 4.25570700  | 3.23384600  |
| H | -4.81452000 | 2.65695800  | 2.89576500  |
| C | -2.10233100 | 4.64051600  | 3.23672100  |
| H | -4.21298000 | 4.92896200  | 3.60198100  |
| C | -1.13058600 | 3.76474300  | 2.78533100  |
| H | -1.81204200 | 5.61417200  | 3.62071200  |
| H | -0.08646100 | 4.04877600  | 2.85506200  |
| C | -0.04996000 | -5.06164500 | 2.41924000  |
| C | 2.41805800  | -5.27885100 | 2.63051600  |
| C | 1.12573500  | -4.19960600 | 4.46298600  |
| H | 2.28040300  | -6.24834800 | 3.12102200  |
| H | 3.35481300  | -4.84640600 | 2.99665400  |
| H | 2.52206900  | -5.45828200 | 1.55438300  |
| H | -0.15882400 | -6.05589400 | 2.86834200  |
| H | -0.00054600 | -5.18016100 | 1.32998500  |
| H | -0.94941800 | -4.48428500 | 2.65984300  |

|   |             |             |             |
|---|-------------|-------------|-------------|
| H | 1.02285000  | -5.17672400 | 4.94937700  |
| H | 0.26384500  | -3.58808400 | 4.74551100  |
| H | 2.02579000  | -3.71323100 | 4.85245300  |
| C | -6.45729100 | 0.98859200  | -2.12229000 |
| O | -5.23249000 | 1.37988700  | -1.55070800 |
| C | -6.82681800 | -0.36541100 | -1.57362400 |
| H | -6.36970900 | 0.93925900  | -3.21852700 |
| H | -7.24945000 | 1.71081700  | -1.87067300 |
| C | -4.86352600 | 2.69182400  | -1.92333400 |
| C | -3.51855200 | 2.99983100  | -1.32030200 |
| H | -5.60970700 | 3.41262900  | -1.55661900 |
| H | -4.80813900 | 2.77176200  | -3.01947000 |
| O | -2.55522000 | 2.15732000  | -1.91722000 |
| H | -3.27139000 | 4.05596700  | -1.50875100 |
| H | -3.54549500 | 2.84372900  | -0.22998900 |
| C | -1.25635200 | 2.47037200  | -1.43391500 |
| C | -0.25118000 | 1.50720800  | -2.00806800 |
| H | -1.24918200 | 2.39916400  | -0.34099300 |
| H | -0.98541200 | 3.49785900  | -1.72335800 |
| O | -0.53663800 | 0.21272400  | -1.51674500 |
| H | -0.30611200 | 1.51035300  | -3.10905100 |
| H | 0.75872400  | 1.81879600  | -1.70222700 |
| C | 0.42753500  | -0.73297600 | -1.92773800 |
| H | 1.43045400  | -0.43766200 | -1.58462500 |
| H | 0.43825200  | -0.80241100 | -3.02748100 |
| O | -1.19742800 | -2.46432200 | -1.84820400 |
| O | -3.87435500 | -3.23259400 | -1.60793300 |
| O | -5.84230400 | -1.29336100 | -1.97457100 |
| C | 2.96653900  | 1.36473000  | 0.19026600  |
| C | 0.77290400  | 1.96442000  | 1.17463200  |
| C | 3.99379900  | 0.36420300  | -0.04754200 |
| C | 4.47817300  | -1.95865900 | -0.67293900 |
| H | -7.81248800 | -0.66290900 | -1.96361100 |
| H | -6.88226100 | -0.31868800 | -0.47656300 |
| C | 0.06947900  | -2.07197600 | -1.33815100 |
| C | -1.56993700 | -3.73830600 | -1.38263700 |
| C | -2.86864400 | -4.12376700 | -2.04237200 |
| C | -5.13290800 | -3.54575200 | -2.15516600 |
| C | -6.15615000 | -2.60705600 | -1.56900700 |
| C | 3.07702900  | 2.67643100  | -0.31575400 |
| C | 0.98566300  | 3.28652300  | 0.69353500  |
| C | 5.38085100  | 0.72054400  | -0.35948700 |
| C | 5.72589800  | -1.57256400 | -1.21927300 |
| C | 3.96015400  | -3.21989500 | -1.04795300 |

|   |             |             |             |
|---|-------------|-------------|-------------|
| H | 0.03027500  | -2.01630400 | -0.24236200 |
| H | 0.83579800  | -2.80785600 | -1.62663100 |
| H | -0.79884800 | -4.48307700 | -1.63550600 |
| H | -1.69320600 | -3.72962400 | -0.28871800 |
| H | -3.13243800 | -5.15650700 | -1.76790700 |
| H | -2.76147500 | -4.06962400 | -3.13619500 |
| H | -5.11180400 | -3.44023600 | -3.25064100 |
| H | -5.41014600 | -4.58338600 | -1.91277700 |
| H | -6.14503300 | -2.68041100 | -0.47166000 |
| H | -7.15749600 | -2.88943800 | -1.92939800 |
| C | 2.08808200  | 3.63235100  | -0.07574300 |
| H | 3.91795100  | 2.92542300  | -0.95069500 |
| H | 0.20784400  | 4.02054800  | 0.84452800  |
| C | 5.93787700  | 1.95608200  | 0.04371600  |
| C | 6.25357300  | -0.24909400 | -0.90605100 |
| C | 6.41997800  | -2.46204200 | -2.05936600 |
| C | 4.66016000  | -4.07974200 | -1.87163000 |
| H | 2.97142200  | -3.50822700 | -0.71255500 |
| C | 2.23765100  | 5.02347300  | -0.70097500 |
| H | 5.31577100  | 2.66976700  | 0.56998600  |
| C | 7.27167700  | 2.25005200  | -0.15687300 |
| C | 7.60904400  | 0.07242800  | -1.10508800 |
| H | 7.36052300  | -2.15177900 | -2.50163800 |
| C | 5.91073300  | -3.70552000 | -2.37428100 |
| H | 4.22413100  | -5.03593900 | -2.14573600 |
| C | 1.11662600  | 5.97887100  | -0.27937100 |
| C | 3.57882800  | 5.64026600  | -0.26945800 |
| C | 2.20897100  | 4.89213700  | -2.23303000 |
| H | 7.66747500  | 3.20316700  | 0.18076700  |
| C | 8.11485900  | 1.30840500  | -0.75749800 |
| H | 8.28483800  | -0.67867900 | -1.49935100 |
| H | 6.46340700  | -4.37075000 | -3.03049400 |
| H | 1.28596100  | 6.96520700  | -0.72437900 |
| H | 0.13610200  | 5.62437700  | -0.61637600 |
| H | 1.07872800  | 6.09908200  | 0.80874100  |
| H | 3.69824300  | 6.63790600  | -0.70815000 |
| H | 3.62477600  | 5.73563800  | 0.82060900  |
| H | 4.42826000  | 5.02906600  | -0.59067600 |
| H | 2.32204400  | 5.87508600  | -2.70553100 |
| H | 3.01370700  | 4.24515700  | -2.59480500 |
| H | 1.25631000  | 4.46146800  | -2.56493800 |
| H | 9.16630700  | 1.52971400  | -0.91262000 |

## References

- [S1] B. Kumar, C. E. Strasser and B. T. King, *J. Org. Chem.*, 2012, **77**, 311.
- [S2] I. Krossing, *Chem. - Eur. J.*, 2001, **7**, 490.
- [S3] J. W. Hall, W. E. Marsh, R. R. Weller and W. E. Hatfield, *Inorg. Chem.*, 1981, **20**, 1033.
- [S4] Gaussian 09, Revision B.01, M. J. Frisch, G. W. Trucks, H. B. Schlegel, G. E. Scuseria, M. A. Robb, J. R. Cheeseman, G. Scalmani, V. Barone, B. Mennucci, G. A. Petersson, H. Nakatsuji, M. Caricato, X. Li, H. P. Hratchian, A. F. Izmaylov, J. Bloino, G. Zheng, J. L. Sonnenberg, M. Hada, M. Ehara, K. Toyota, R. Fukuda, J. Hasegawa, M. Ishida, T. Nakajima, Y. Honda, O. Kitao, H. Nakai, T. Vreven, J. A. Montgomery, Jr., J. E. Peralta, F. Ogliaro, M. Bearpark, J. J. Heyd, E. Brothers, K. N. Kudin, V. N. Staroverov, T. Kieth, R. Kobayashi, J. Normand, K. Raghavachari, A. Rendell, J. C. Burant, S. S. Iyengar, J. Tomasi, M. Cossi, N. Rega, N. J. Millam, M. Klene, J. E. Knox, J. B. Cross, V. Bakken, C. Adamo, J. Jaramillo, R. Gomperts, R. E. Stratmann, O. Yazyev, A. J. Austin, R. Cammi, C. Pomelli, J. W. Ochterski, R. L. Martin, K. Morokuma, V. G. Zakrzewski, G. A. Voth, P. Salvador, J. J. Dannenberg, S. Dapprich, A. D. Daniels, Ö. Farkas, J. B. Foresman, J. V. Ortiz, J. Cioslowski and D. J. Fox, *Gaussian 09, Revision B.01*, Gaussian, Inc., Wallingford CT, **2010**.
